# Supplementary material for: Factors influencing the measurement of the secretion rate of extracellular vesicles
Source: Royal Society of Chemistry journal article supplement (doi:10.1039/d0an01199a), 2020-01-01
Supplement: d0an01199a1.pdf [file d0an01199a1.pdf]

## Supplementary Information

### Factors Influencing Measurement of the Secretion Rate of Extracellular Vesicles

Yi Wen<sup>1</sup>, Yundi Chen<sup>1</sup>, Guosheng Wang<sup>1</sup>, Komal Abhange<sup>1</sup>, Fei Xue<sup>1</sup>, Zachary Quinn<sup>1</sup>, Wenjun Mao<sup>2,\*</sup>, and  
Yuan Wan<sup>1,\*</sup>

<sup>1</sup>The Pq Laboratory of Micro/Nano BiomeDx, Department of Biomedical Engineering, Binghamton University-SUNY, Binghamton, New York 13902, United States

<sup>2</sup>Department of Cardiothoracic Surgery, Wuxi People's Hospital Affiliated to Nanjing Medical University, Wuxi, Jiangsu 214023, China

**Table S1: Comparison of FBS-derived protein in isolated EV pellet at 24-h and 48-h time point.** The abundance of top 25 mutual proteins in two groups detected by NanoLC-MS/MS.

| <b>Number</b> | <b>Gene Symbol</b> | <b>24h</b> | <b>48h</b> |
|---------------|--------------------|------------|------------|
| 1             | TF                 | 5992171533 | 4049531142 |
| 2             | SERPINA1           | 5060952805 | 4754967731 |
| 3             | LOC516742          | 2704526056 | 3787793034 |
| 4             | AHSG               | 1263138730 | 2300543760 |
| 5             | ORM1               | 877064629  | 621098210  |
| 6             | A2M                | 664351507  | 5758086477 |
| 7             | FN1                | 528704378  | 763152712  |
| 8             | HBG                | 495271691  | 239849813  |
| 9             | SERPINA3-1         | 437556096  | 232233685  |
| 10            | APOA1              | 418448965  | 899699452  |
| 11            | TTR                | 404208000  | 261339084  |
| 12            | HBA1; HBA          | 386268438  | 104756687  |
| 13            | KRT82              | 338361090  | 45237912   |
| 14            | SLC25A5            | 335138636  | 67894668   |
| 15            | MYL12A             | 328632726  | 178744184  |
| 16            | SERPINC1           | 285473956  | 292272596  |
| 17            | VDAC1              | 214416576  | 67855503   |
| 18            | C3                 | 201519671  | 594763061  |
| 19            | A1BG               | 201295558  | 169431025  |
| 20            | VTN                | 196885699  | 242074079  |
| 21            | ADIPOQ             | 189945389  | 127302270  |
| 22            | SERPINA3-7         | 189016775  | 224630050  |
| 23            | HIST1H1D           | 188326525  | 122002662  |
| 24            | HSPA9              | 169749260  | 55243761   |
| 25            | RPL7A              | 164606223  | 142173231  |

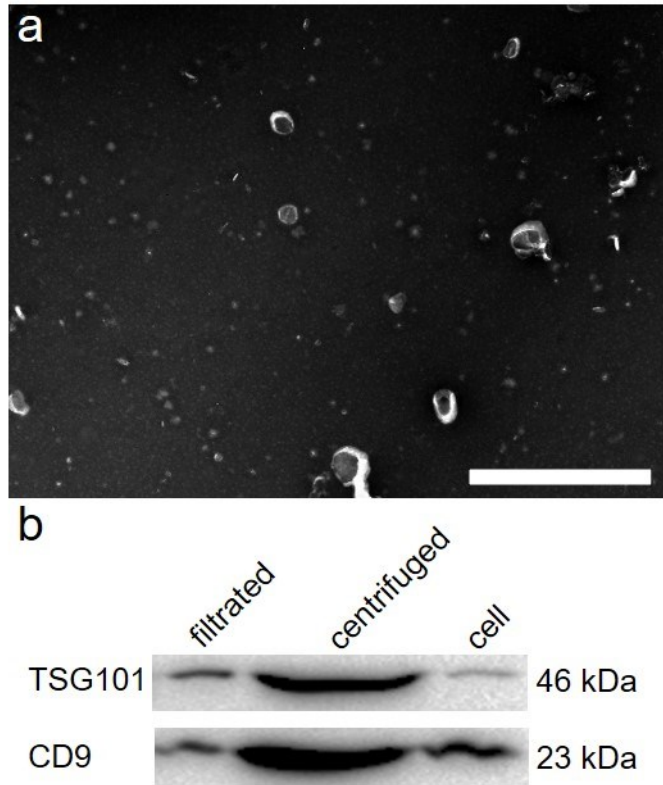

**Figure S1. Characterization of EVs in centrifuged supernatant.** **a**, TEM image shows MDA-MB-231 cell-derived EVs in supernatant processed by 20,000 g centrifugation. Scale bar represents 1  $\mu\text{m}$ . **b**, TSG101 and CD9 proteins were extracted and identified from EVs in 20,000 g centrifuged supernatant, parental cells, and EVs in filtrated supernatant. Supernatant was lyophilized followed by lysis and western blot analysis.

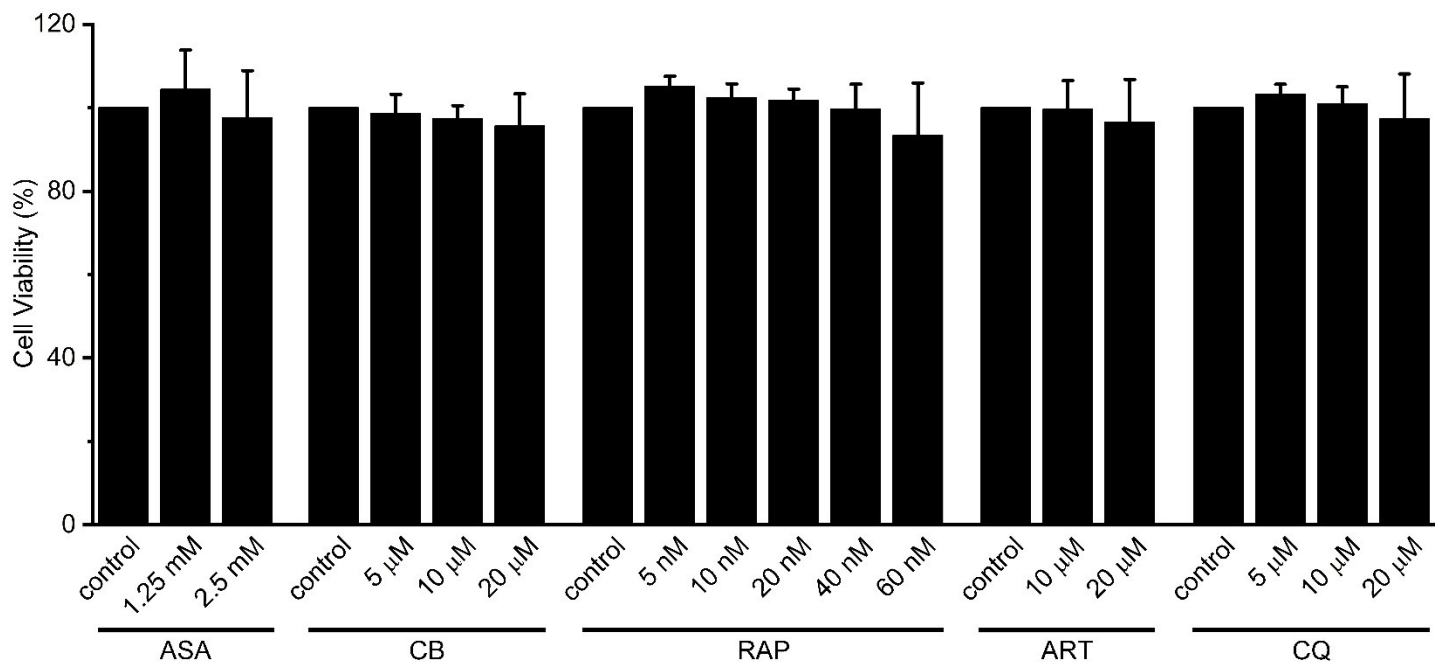

**Figure S2.** The viability of MDA-MB-231 cells treated with different doses of acetylsalicylic acid (ASA), celecoxib (CB), rapamycin (RAP), artemisinin (ART), and chloroquine (CQ) for 24 h. Cell viability was determined by CCK-8 assay.
